# Supplementary material
Source: MDPI journal article supplement (https://www.mdpi.com/1996-1073/17/2/345)
Supplement: s1 [file s1]

Archive with 3 entries (3 files):
- Table S1_Stages and resources taken into account when assessing the life cycle of technically complex devices.docx.pdf
- Table S2_Materials used for the productionconstruction of technically complex devices.pdf
- Table S3_Impact categories used when assessing technically complex devices.pdf
