# Supplementary material
Source: MDPI journal article supplement (https://www.mdpi.com/1996-1073/17/2/345)
Supplement: s1 [file s1 › Table S1_Stages and resources taken into account when assessing the life cycle of technically complex devices.docx.pdf]

**Table S1.** Stages and resources taken into account when assessing the life cycle of complex technical devices

| Object                               | Source | Number of materials used, units                                                                   | Production          |                                           |             |                                                       | Transportation of materials and components | Installation                             |                              | Operation                                                                                              |                      | Waste management after end-of-life operation |
|--------------------------------------|--------|---------------------------------------------------------------------------------------------------|---------------------|-------------------------------------------|-------------|-------------------------------------------------------|--------------------------------------------|------------------------------------------|------------------------------|--------------------------------------------------------------------------------------------------------|----------------------|----------------------------------------------|
|                                      |        |                                                                                                   | Types of processing | Auxiliary structures                      | Electricity | Other resources*                                      |                                            | Land acquisition, site preparation, road | Transportation of structures | Technical service                                                                                      | Repair               |                                              |
| Offshore wind turbine (Brazil, 2022) | [20]   | Total – 5<br>Gandola – 4<br>Hub and blades – 2<br>Tower – 3<br>Platform – 2<br>Mooring system - 1 | were not considered | were not considered                       | +           | were not considered                                   | Freight transport                          | were not considered                      | Sea transport                | Technical service - 2 times / year,<br>Lubricating oil -1 time / 3 years                               | In case of breakdown | Recycling                                    |
| Offshore wind turbine (USA, 2014)    | [21]   | Total – 6<br>Gandola – 5<br>Blades – 4<br>Tower - 1                                               | were not considered | were not considered                       | -           | Lubricating oil                                       | were not considered                        | were not considered                      | Sea transport                | were not considered                                                                                    | were not considered  | Recycling, incineration, disposal            |
| Onshore wind turbine (USA, 2014)     | [22]   | Total – 7<br>Gandola – 5<br>Rotor – 4<br>Tower - 1                                                | were not considered | Foundation                                | -           | Lubricating oil                                       | were not considered                        | were not considered                      | Freight transport            | Changing oils and lubricants - 1 time / 3 years, rotor blades, reducer and generator 1 time / 20 years | were not considered  | Recycling, incineration, disposal            |
| Onshore wind turbine (USA, 2019)     | [23]   | Total – 12<br>Gandola – 9<br>Rotor – 9<br>Tower - 2                                               | were not considered | Foundation, electrical wiring, substation | +           | Lubricating oil, varnish, glue, electronic components | no data                                    | Site and access road preparation         | Sea and freight transport    | Lubricating oil -1 time / 2 years, brake system – 1 time / 5 years, control system - 1 time / 10 years | In case of breakdown | Recycling, incineration, disposal            |
| Onshore wind turbine (USA, 2022)     | [24]   | Total – 9<br>Gandola – 5<br>Blades – 2<br>Tower - 1                                               | were not considered | Foundation                                | +           | were not considered                                   | were not considered                        | were not considered                      | Sea and freight transport    | were not considered                                                                                    | were not considered  | were not considered                          |

| Object                               | Source | Number of materials used, units      | Types of processing                                      | Production                                |             |                                               | Transportation of materials and components | Installation                                       |                              | Operation                                                                           |                      | Waste management after end-of-life operation |
|--------------------------------------|--------|--------------------------------------|----------------------------------------------------------|-------------------------------------------|-------------|-----------------------------------------------|--------------------------------------------|----------------------------------------------------|------------------------------|-------------------------------------------------------------------------------------|----------------------|----------------------------------------------|
|                                      |        |                                      |                                                          | Auxiliary structures                      | Electricity | Other resources*                              |                                            | Land acquisition, site preparation, road           | Transportation of structures | Technical service                                                                   | Repair               |                                              |
| Wind power plant (Jordan, 2019)      | [25]   | Total – 15                           | no data                                                  | Foundation, electrical wiring, substation | +           | Varnish, glue, sealant, electronic components | were not considered                        | Site and access road preparation                   | Sea and freight transport    | Lubricating oil -1 time / 5 years                                                   | In case of breakdown | Recycling, incineration, disposal            |
| Onshore wind turbine (Iran, 2018)    | [26]   | Total – 8                            | no data                                                  | Foundation                                | +           | were not considered                           | were not considered                        | were not considered                                | were not considered          | Changing the oil in the gearbox and cooling system, lubrication of mechanical parts | were not considered  | Recycling, incineration, disposal            |
| Onshore wind turbine (Germany, 2010) | [13]   | Total – 13                           | Injection casting, rolling, wire drawing                 | Foundation, electrical wiring, substation | +           | were not considered                           | were not considered                        | Site and access road preparation                   | were not considered          | were not considered                                                                 | were not considered  | Recycling, disposal                          |
| Onshore wind turbine (France, 2003)  | [13]   | Total – 13                           | Injection molding, rolling, wire drawing, polymerization | Foundation, electronics                   | +           | Paint (alkyd)                                 | were not considered                        | Land acquisition, site and access road preparation | were not considered          | were not considered                                                                 | were not considered  | Recycling, disposal                          |
| Onshore wind turbine (Denmark, 2004) | [13]   | Total – 12                           | Injection casting, rolling, welding, wire drawing        | Foundation, electronics                   | +           | Zinc coating                                  | were not considered                        | Land acquisition, site and access road preparation | were not considered          | were not considered                                                                 | were not considered  | Recycling, disposal                          |
| Onshore wind turbine (World, 2014)   | [27]   | Total – 7<br>Blades – 2<br>Tower - 1 | were not considered                                      | Electronics                               | -           | Water, lubricating oil                        | were not considered                        | were not considered                                | Sea, railway,                | Replacement of consumables                                                          | In case of breakdown | Recycling, incineration, disposal            |

| Object                                                                  | Source | Number of materials used, units                                                      | Types of processing            | Production                  |             |                             | Transporta-<br>tion of materials and components | Installation                             |                                   | Operation                        |                      | Waste management after end-of-life operation |
|-------------------------------------------------------------------------|--------|--------------------------------------------------------------------------------------|--------------------------------|-----------------------------|-------------|-----------------------------|-------------------------------------------------|------------------------------------------|-----------------------------------|----------------------------------|----------------------|----------------------------------------------|
|                                                                         |        |                                                                                      |                                | Auxiliary structures        | Electricity | Other resources*            |                                                 | Land acquisition, site preparation, road | Transporta-<br>tion of structures | Technical service                | Repair               |                                              |
|                                                                         |        |                                                                                      |                                |                             |             |                             |                                                 |                                          |                                   | freight transport                |                      |                                              |
| Onshore wind turbine (EU, 2020)                                         | [28]   | Total – 12<br>Gandola – 7<br>Generator – 5<br>Gearbox - 5<br>Tower – 7<br>Blades - 1 | were not considered            | Foundation, submarine cable | +           | were not considered         | were not considered                             | were not considered                      | were not considered               | were not considered              | were not considered  | were not considered                          |
| Electric motor for electric vehicle (Switzerland, 2015)                 | [13]   | Total – 10                                                                           | Rolling, wire drawing, coating | Electronics                 | +           | Heat supply, nickel coating | were not considered                             | were not considered                      | were not considered               | were not considered              | were not considered  | were not considered                          |
| Electric vehicle (Canada, 2018)                                         | [29]   | Total – 11                                                                           | were not considered            | were not considered         | +           | Paints, coatings            | Sea and freight transport                       | were not considered                      | were not considered               | were not considered              | were not considered  | Recycling                                    |
| Electric vehicle (EU, 2022)                                             | [30]   | Total – 11                                                                           | were not considered            | Electronics                 | +           | Textile                     | were not considered                             | Road construction                        | were not considered               | Replacement of tires, brake pads | were not considered  | Recycling, disposal                          |
| Hydrogen fuel cell power plant for a bus (Russian Federation, 2021)     | [31]   | Total – 6                                                                            | no data                        | Fuel cell                   | +           | were not considered         | were not considered                             | were not considered                      | were not considered               | Replacement of consumables       | In case of breakdown | Recycling, disposal                          |
| Hydrogen fuel cell propulsion system for bus (Russian Federation, 2021) | [31]   | Total – 5                                                                            | no data                        | Accumulator                 | +           | were not considered         | were not considered                             | were not considered                      | were not considered               | Replacement of consumables       | In case of breakdown | Recycling, disposal                          |
| Passenger plane (World, 2019)                                           | [13]   | Total – 5                                                                            | Injection molding              | were not considered         | +           | Water, heat supply          | were not considered                             | were not considered                      | were not considered               | were not considered              | were not considered  | Recycling                                    |

| Object                                 | Source | Number of materials used, units     | Types of processing                                       | Production           |             |                                                                                                                                       | Transportation of materials and components | Installation                             |                              | Operation                                           |                     | Waste management after end-of-life operation |
|----------------------------------------|--------|-------------------------------------|-----------------------------------------------------------|----------------------|-------------|---------------------------------------------------------------------------------------------------------------------------------------|--------------------------------------------|------------------------------------------|------------------------------|-----------------------------------------------------|---------------------|----------------------------------------------|
|                                        |        |                                     |                                                           | Auxiliary structures | Electricity | Other resources*                                                                                                                      |                                            | Land acquisition, site preparation, road | Transportation of structures | Technical service                                   | Repair              |                                              |
| Passenger plane (Switzerland, 2015)    | [32]   | Total – 5                           | were not considered                                       | were not considered  | -           | were not considered                                                                                                                   | were not considered                        | were not considered                      | were not considered          | were not considered                                 | were not considered | Recycling, disposal                          |
| Passenger plane (UK, 2013)             | [33]   | Total (without aircraft engine) – 5 | no data                                                   | no data              | +           | no data                                                                                                                               | Air and road transport                     | were not considered                      | Air and road transport       | were not considered                                 | were not considered | Recycling, incineration, disposal            |
| Aircraft engine (USA, 2015)            | [34]   | Total – 5                           | were not considered                                       | were not considered  | -           | were not considered                                                                                                                   | were not considered                        | were not considered                      | were not considered          | were not considered                                 | were not considered | were not considered                          |
| Marine engine (Peru, 2018)             | [13]   | Total – 5                           | Metalworking (steel)                                      | were not considered  | -           | were not considered                                                                                                                   | were not considered                        | were not considered                      | were not considered          | were not considered                                 | were not considered | Recycling                                    |
| Bus (Germany, 2004)                    | [13]   | Total – 13                          | Rolling (steel), tempering (glass), wire drawing (copper) | Manufacture building | +           | Heat supply, diesel, lubricating oil, acetic, hydrochloric, nitric, sulfuric acid, paint (alkyd), refrigerant, sodium hydroxide, etc. | were not considered                        | were not considered                      | were not considered          | were not considered                                 | were not considered | Recycling                                    |
| Gas turbine power plant (Brazil, 2003) | [14]   | Total – 4                           | no data                                                   | Foundation           | +           | were not considered                                                                                                                   | Freight transport                          | were not considered                      | Freight transport            | Replacement of consumables (oil, spare parts, etc.) |                     | Recycling, disposal                          |
| Gas turbine installation (EU, 2007)    | [13]   | Total – 5                           | were not considered                                       | Foundation           | +           | Heat supply                                                                                                                           | were not considered                        | Land acquisition                         | were not considered          | were not considered                                 | were not considered | were not considered                          |

| Object                                             | Source | Number of materials used, units | Production                                                        |                      |             |                                             | Transportation of materials and components | Installation                             |                              | Operation                  |                     | Waste management after end-of-life operation |
|----------------------------------------------------|--------|---------------------------------|-------------------------------------------------------------------|----------------------|-------------|---------------------------------------------|--------------------------------------------|------------------------------------------|------------------------------|----------------------------|---------------------|----------------------------------------------|
|                                                    |        |                                 | Types of processing                                               | Auxiliary structures | Electricity | Other resources*                            |                                            | Land acquisition, site preparation, road | Transportation of structures | Technical service          | Repair              |                                              |
| Gas turbine installation (Norway, 2021)            | [13]   | Total – 8                       | Rolled sheets, metalworking (steel), injection molding (polymers) | were not considered  | -           | Organic chemicals                           | were not considered                        | were not considered                      | were not considered          | were not considered        | were not considered | Incineration, disposal                       |
| Micro gas turbine installation (EU, 2007)          | [13]   | Total – 7                       | Rolled sheets, welding, polymerization, construction work         | Manufacture building | +           | Heat supply, water                          | were not considered                        | Land acquisition                         | Road transport               | were not considered        | were not considered | were not considered                          |
| Combined cycle steam power plant (EU, 2007)        | [13]   | Total – 12                      | were not considered                                               | were not considered  | +           | Heat supply, diesel                         | were not considered                        | Land acquisition                         | were not considered          | were not considered        | were not considered | were not considered                          |
| Combined cycle steam power plant (Indonesia, 2021) | [15]   | no data                         | were not considered                                               | were not considered  | +           | Water, reagents, lubricating oil            | were not considered                        | were not considered                      | were not considered          | were not considered        | were not considered | were not considered                          |
| Combined cycle steam power plant (Indonesia, 2022) | [16]   | no data                         | were not considered                                               | no data              | +           | Water, reagents, lubricating oil, chemicals | no data                                    | Land acquisition, site preparation       | no data                      | Replacement of consumables | no data             | Recycling, incineration, disposal            |
| Combined cycle steam power plant (China, 2023)     | [17]   | Total – 2                       | were not considered                                               | were not considered  | +           | were not considered                         | were not considered                        | were not considered                      | were not considered          | were not considered        | were not considered | were not considered                          |
| Combined cycle power                               | [18]   | Total – 15                      | were not considered                                               | were not considered  | +           | Water (salty, fresh)                        | were not considered                        | Land acquisition,                        | no data                      | Replacement of consumables | were not considered | Recycling, incineration, disposal            |

| Object                                         | Source | Number of materials used, units                           | Types of processing | Production           |             |                  | Transportation of materials and components | Installation                                              |                              | Operation           |                     | Waste management after end-of-life operation |
|------------------------------------------------|--------|-----------------------------------------------------------|---------------------|----------------------|-------------|------------------|--------------------------------------------|-----------------------------------------------------------|------------------------------|---------------------|---------------------|----------------------------------------------|
|                                                |        |                                                           |                     | Auxiliary structures | Electricity | Other resources* |                                            | Land acquisition, site preparation, road site preparation | Transportation of structures | Technical service   | Repair              |                                              |
| plant (Italy, 2019)                            |        |                                                           |                     |                      |             |                  |                                            |                                                           |                              |                     |                     |                                              |
| Thermal power plant (Russian Federation, 2021) | [19]   | Total - 4<br>Engine – 3<br>Generator – 2<br>Container - 1 | were not considered | were not considered  | +           | Water            | were not considered                        | were not considered                                       | were not considered          | were not considered | were not considered | Recycling                                    |

\* Water consumption, heat supply, fuel for construction machines, paint, lubricating oils, etc.
