# Supplementary material
Source: MDPI journal article supplement (https://www.mdpi.com/1996-1073/17/2/345)
Supplement: s1 [file s1 › Table S2_Materials used for the productionconstruction of technically complex devices.pdf]

**Table S2.** Materials used for the production/construction of complex technical devices

| Type of complex technically device                      | Source | Number of materials used, units | Metals                 |                         |                       | Other metals                                                     | Poly-mers | Non-metallic materials                |                  |                                     |
|---------------------------------------------------------|--------|---------------------------------|------------------------|-------------------------|-----------------------|------------------------------------------------------------------|-----------|---------------------------------------|------------------|-------------------------------------|
|                                                         |        |                                 | Iron, steel, cast iron | Aluminum and its alloys | Copper and its alloys |                                                                  |           | Composites (fiberglass, carbon fiber) | Concrete, gravel | Other                               |
| Offshore wind turbine (Brazil, 2022)                    | [20]   | 5                               | +                      | +                       | +                     | -                                                                | -         | +                                     | +                | -                                   |
| Offshore wind turbine (USA, 2014)                       | [21]   | 6                               | +                      | +                       | +                     | -                                                                | -         | +                                     | -                | -                                   |
| Onshore wind turbine (USA, 2014)                        | [22]   | 7                               | +                      | +                       | +                     | -                                                                | -         | +                                     | +                | -                                   |
| Onshore wind turbine (USA, 2019)                        | [23]   | 12                              | +                      | +                       | +, brass              | -                                                                | +         | +                                     | +                | -                                   |
| Onshore wind turbine (USA, 2022)                        | [24]   | 9                               | +                      | +                       | +                     | Neodymium, dysprosium                                            | +         | +                                     | +                | Epoxy resin                         |
| Wind power plant (Jordan, 2019)                         | [25]   | 15                              | +                      | +                       | +                     | Zinc                                                             | +         | +                                     | +                | Durometers, ceramics, glass, magnet |
| Onshore wind turbine (Iran, 2018)                       | [26]   | 8                               | +                      | +                       | +                     | Zinc                                                             | +         | +                                     | +                | Rubber                              |
| Onshore wind turbine (Germany, 2010)                    | [13]   | 13                              | +                      | +                       | +                     | -                                                                | +         | +                                     | +                | Epoxy resin                         |
| Onshore wind turbine (France, 2003)                     | [13]   | 13                              | +                      | +                       | +                     | -                                                                | +         | +                                     | +                | Epoxy resin                         |
| Onshore wind turbine (Denmark, 2004)                    | [13]   | 12                              | +                      | +                       | +                     | Zinc                                                             | +         | +                                     | +                | Epoxy resin                         |
| Onshore wind turbine (World, 2014)                      | [27]   | 7                               | +                      | +                       | +                     | -                                                                | +         | +                                     | -                | -                                   |
| Onshore wind turbine (EU, 2020)                         | [28]   | 12                              | +                      | +                       | +                     | Chromium, cobalt, lead, manganese, molybdenum, rare earth metals | -         | -                                     | +                | Bor                                 |
| Electric motor for electric vehicle (Switzerland, 2015) | [13]   | 10                              | +                      | +                       | +, brass              | Nickel                                                           | +         | -                                     | -                | Polyester resin, nylon              |

| Type of complex technically device                                      | Source | Number of materials used, units | Metals                 |                         |                       | Non-metallic materials                     |           |                                       |                  |                                                                               |
|-------------------------------------------------------------------------|--------|---------------------------------|------------------------|-------------------------|-----------------------|--------------------------------------------|-----------|---------------------------------------|------------------|-------------------------------------------------------------------------------|
|                                                                         |        |                                 | Iron, steel, cast iron | Aluminum and its alloys | Copper and its alloys | Other metals                               | Poly-mers | Composites (fiberglass, carbon fiber) | Concrete, gravel | Other                                                                         |
| Electric vehicle (Canada, 2018)                                         | [29]   | 11                              | +                      | +                       | +                     | Nickel, zinc, magnesium, lead              | +         | -                                     | -                | Rubber, glass, wood                                                           |
| Electric vehicle (EU, 2022)                                             | [30]   | 11                              | +                      | +                       | +                     | Nickel, magnesium, lead, manganese, cobalt | +         | -                                     | -                | Rubber, glass, wood                                                           |
| Hydrogen fuel cell power plant for a bus (Russian Federation, 2021)     | [31]   | 8                               | +                      | +                       | +                     | -                                          | +         | -                                     | -                | Graphite, lithium pentatitanate (LTO)                                         |
| Hydrogen fuel cell propulsion system for bus (Russian Federation, 2021) | [31]   | 9                               | +                      | +                       | +                     | -                                          | +         | -                                     | -                | Graphite, lithium pentatitanate (LTO), ethylene carbonate, dimethyl carbonate |
| Passenger plane (World, 2019)                                           | [13]   | 5                               | +                      | +                       | -                     | Nickel, titanium                           | -         | +                                     | -                | -                                                                             |
| Passenger plane (Switzerland, 2015)                                     | [32]   | 5                               | +                      | +                       | -                     | Titanium                                   | -         | +                                     | -                | +                                                                             |
| Passenger plane (UK, 2013)                                              | [33]   | 5                               | +                      | +                       | -                     | Titanium                                   | -         | +                                     | -                | +                                                                             |
| Aircraft engine (USA, 2015)                                             | [34]   | 5                               | +                      | +                       | -                     | Nickel, titanium                           | -         | +                                     | -                | -                                                                             |
| Marine engine (Peru,2018)                                               | [13]   | 5                               | +                      | +                       | -                     | -                                          | -         | -                                     | -                | -                                                                             |
| Bus (Germany, 2004)                                                     | [13]   | 13                              | +                      | +                       | +, brass              | -                                          | +         | -                                     | -                | Resin, mineral wool, synthetic rubber                                         |
| Gas turbine power plant (Brazil, 2003)                                  | [14]   | 4                               | +                      | +                       | -                     | -                                          | -         | -                                     | +                | -                                                                             |
| Gas turbine installation (EU, 2007)                                     | [13]   | 5                               | +                      | -                       | +                     | -                                          | +         | -                                     | +                | -                                                                             |
| Gas turbine installation (Norway, 2021)                                 | [13]   | 8                               | +                      | +                       | +                     | -                                          | +         | -                                     | -                | -                                                                             |

| Type of complex technically device             | Source | Number of materials used, units | Metals                 |                         |                       | Non-metallic materials                                |           |                                       |                  |                                            |
|------------------------------------------------|--------|---------------------------------|------------------------|-------------------------|-----------------------|-------------------------------------------------------|-----------|---------------------------------------|------------------|--------------------------------------------|
|                                                |        |                                 | Iron, steel, cast iron | Aluminum and its alloys | Copper and its alloys | Other metals                                          | Poly-mers | Composites (fiberglass, carbon fiber) | Concrete, gravel | Other                                      |
| Micro gas turbine installation (EU, 2007)      | [13]   | 7                               | +                      | +                       | +                     | Iron-nickel-chrome alloy                              | +         | -                                     | -                | -                                          |
| Combined cycle steam power plant (EU, 2007)    | [13]   | 12                              | +                      | +                       | +                     | Nickel, cobalt, chromium                              | +         | -                                     | +                | Mineral wool                               |
| Combined cycle steam power plant (China, 2023) | [17]   | 2                               | +                      | -                       | -                     | -                                                     | -         | -                                     | +                | -                                          |
| Combined cycle power plant (Italy, 2019)       | [18]   | 15                              | +                      | +                       | +                     | Nickel, zinc, chromium, magnesium, uranium, zirconium | -         | -                                     | +                | Calcite, barite, fluorite, kaolinite, wood |
| Thermal power plant (Russian Federation, 2021) | [19]   | 4                               | +                      | +                       | +                     | -                                                     | -         | -                                     | -                | -                                          |
