# Supplementary material
Source: MDPI journal article supplement (https://www.mdpi.com/1996-1073/17/2/345)
Supplement: s1 [file s1 › Table S3_Impact categories used when assessing technically complex devices.pdf]

**Table S3.** Impact categories used when assessing complex technical devices

| Object                               | Source | Number of impact categories | Categories of impact                                                                                                                                                                                                                                                                                                                                                                                                                                    | Impact calculation             |             | Information sources          |                     |              |                                   |
|--------------------------------------|--------|-----------------------------|---------------------------------------------------------------------------------------------------------------------------------------------------------------------------------------------------------------------------------------------------------------------------------------------------------------------------------------------------------------------------------------------------------------------------------------------------------|--------------------------------|-------------|------------------------------|---------------------|--------------|-----------------------------------|
|                                      |        |                             |                                                                                                                                                                                                                                                                                                                                                                                                                                                         | Method                         | Software    | Database                     | Manufacturers' data | Own research | Publications by other researchers |
| Offshore wind turbine (Brazil, 2022) | [20]   | 2                           | GWP, total energy demand                                                                                                                                                                                                                                                                                                                                                                                                                                |                                | Calculation | Ecoinvent                    | +                   | -            | +                                 |
| Onshore wind turbine (USA, 2014)     | [22]   | 18                          | Fossil resource depletion, metal depletion, natural land conversion, occupation of urban lands, occupation of agricultural lands, marine ecotoxicity, freshwater ecotoxicity, terrestrial acidification, climate-ecosystem change, terrestrial ecotoxicity, ionizing radiation, freshwater eutrophication, particulate matter formation, photochemical oxidant formation, water depletion, human toxicity, ozone depletion, climate change-human health | ReCiPe 2008 v. 1.03            | SimaPro 7.3 | Ecoinvent                    | -                   | -            | +                                 |
| Onshore wind turbine (USA, 2019)     | [23]   | 12                          | GWP, smog, ozone depletion, acidification, eutrophication, carcinogenic and non-carcinogenic substances, ecotoxicity, respiratory effects, fossil fuel depletion, aggregate energy demand, water depletion index                                                                                                                                                                                                                                        | -                              | SimaPro 8   | Ecoinvent                    | +                   | -            | +                                 |
| Onshore wind turbine (USA, 2022)     | [24]   | 2                           | GWP, total energy demand                                                                                                                                                                                                                                                                                                                                                                                                                                | -                              | SimaPro 9.1 | Ecoinvent 3.6, US-EI 2.2     | -                   | -            | +                                 |
| Wind power plant (Jordan, 2019)      | [25]   | 9                           | GWP, smog, ozone depletion, acidification, eutrophication, carcinogenic and non-carcinogenic substances, ecotoxicity, respiratory effects                                                                                                                                                                                                                                                                                                               | -                              | SimaPro 7.1 | Ecoinvent                    | +                   | -            | +                                 |
| Onshore wind turbine (Iran, 2018)    | [26]   | 1                           | Total energy demand                                                                                                                                                                                                                                                                                                                                                                                                                                     |                                | Calculation | -                            | +                   | -            | +                                 |
| Electric vehicle (Canada, 2018)      | [29]   | 2                           | GWP, total energy demand                                                                                                                                                                                                                                                                                                                                                                                                                                |                                | Calculation | European Energy Agency, 2016 | +                   | -            | +                                 |
| Electric vehicle (EU, 2022)          | [30]   | 5                           | GWP, formation of fine particulate matter, carcinogenic and non-carcinogenic substances, mineral resource deficiency                                                                                                                                                                                                                                                                                                                                    | -                              | SimaPro     | Ecoinvent 3.6, BRUSA, 2019   | +                   | -            | +                                 |
| Hydrogen fuel cell power plant for a | [31]   | 2                           | CO <sub>2</sub> emissions, energy costs                                                                                                                                                                                                                                                                                                                                                                                                                 | Methodology for assessing cars | -           |                              | -                   | -            | +                                 |

|                                                                         |      |    |                                                                                                                                                                                                                                                                                                  |                                                                                          |               |                              |   |   |   |
|-------------------------------------------------------------------------|------|----|--------------------------------------------------------------------------------------------------------------------------------------------------------------------------------------------------------------------------------------------------------------------------------------------------|------------------------------------------------------------------------------------------|---------------|------------------------------|---|---|---|
| bus (Russian Federation, 2021)                                          |      |    |                                                                                                                                                                                                                                                                                                  | and their power plants FSUE «NAMI»                                                       |               |                              |   |   |   |
| Hydrogen fuel cell propulsion system for bus (Russian Federation, 2021) | [31] | 2  | CO <sub>2</sub> emissions, energy costs                                                                                                                                                                                                                                                          |                                                                                          |               | Ecoinvent v.3, GREET, ELPICA | - | - | + |
| Passenger plane (Switzerland, 2015)                                     | [32] | 4  | GWP, soil acidification, photochemical oxidant formation, particulate matter formation                                                                                                                                                                                                           | -                                                                                        | SimaPro 8     | Ecoinvent 3.1                | - | + | + |
| Passenger plane (UK, 2013)                                              | [33] | 11 | Fossil fuels, minerals, land use, acidification/eutrophication, ecotoxicity, ozone depletion, radiation, climate change, organic and inorganic substances, carcinogens                                                                                                                           | Eco-Indicator 99                                                                         | SimaPro 7.1.8 | Ecoinvent v.2                | - | - | + |
| Gas turbine power plant (Brazil, 2003)                                  | [14] | 11 | Climate change, ozone depletion, acidification/eutrophication, carcinogens, radiation, ecotoxicity, land use, respiratory organic and inorganic substances, fossil fuels, minerals                                                                                                               | -                                                                                        | SimaPro 5.1   | Ecoinvent                    | + | - | + |
| Combined cycle steam power plant (Indonesia, 2021)                      | [15] | 8  | Acidification, eutrophication, GWP, human toxicity potential, marine aquatic ecotoxicity, ozone depletion, photochemical oxidation, terrestrial ecotoxicity                                                                                                                                      | Calculation                                                                              | OpenLCA 1.9   | Ecoinvent                    | + | + | + |
| Combined cycle steam power plant (Indonesia, 2022)                      | [16] | 13 | GWP: fossil fuel, biogenic, land use change, general, acidification potential, eutrophication potential: terrestrial, freshwater, seawater, photochemical oxidant generation potential, ozone depletion potential, abiotic depletion potential: elements, fossil fuels, water scarcity footprint | -                                                                                        | OpenLCA 1.11  | Ecoinvent 3.7.1              | + | - | + |
| Combined cycle steam power plant (China, 2023)                          | [17] | 2  | GHG emissions, NO <sub>x</sub>                                                                                                                                                                                                                                                                   | Calculation                                                                              |               | -                            | + | - | + |
| Combined cycle power plant (Italy, 2019)                                | [18] | 6  | GHG emissions, ozone-depleting gases, ground-level ozone formation, acidification, eutrophication, fossil resource depletion                                                                                                                                                                     | Calculation                                                                              |               | Ecoinvent                    | + | + | + |
| Thermal power plant (Russian Federation, 2021)                          | [19] | 6  | Conditional mass of harmful substances in wastewater, reduced mass of harmful substances released into the atmosphere, GHG emissions, thermal pollution, electricity consumption                                                                                                                 | Methodology «Determining the economic efficiency of environmental protection measures..» | -             | -                            | + | - | + |
